# Reconstructing the history of variation in effective population size along phylogenies.

Mathieu Brevet<sup>1</sup>, Nicolas Lartillot<sup>2</sup>

<sup>1</sup> *Station d'écologie théorique et expérimentale UMR 5321, 09200 Moulis, France.*

<sup>2</sup> *Université Lyon 1, CNRS, UMR 5558, Laboratoire de Biométrie et Biologie Evolutive.*

`nicolas.lartillot@univ-lyon1.fr`

**Running head:** A phylogenetic history of  $N_e$

# ABSTRACT

The nearly-neutral theory predicts specific relations between effective population size ( $N_e$ ), and patterns of divergence and polymorphism, which depend on the shape of the distribution of fitness effects (DFE) of new mutations. However, testing these relations is not straightforward since  $N_e$  is difficult to estimate in practice. For that reason, indirect proxies for  $N_e$  have often been used to test the nearly-neutral theory, although with mixed results. Here, we introduce an integrative comparative framework allowing for an explicit reconstruction of the phylogenetic history of  $N_e$ , thus leading to a quantitative test of the nearly-neutral theory and an independent estimation of the shape parameter of the DFE. We applied our method to primates, for which the nearly-neutral predictions were mostly verified. Estimates of the shape parameter were compatible with independent measures based on site frequency spectra. The reconstructed history of  $N_e$  in primates seems consistent with current knowledge and shows a clear phylogenetic structure at the super-family level. Altogether, our integrative framework provides a quantitative assessment of the role of  $N_e$  in modulating patterns of genetic variation, while giving a synthetic picture of the long-term trends in  $N_e$  variation across a group of species.

# Introduction

Effective population size ( $N_e$ ) is a central parameter in population genetics and in molecular evolution, impacting both genetic diversity and the strength of selection (Charlesworth, 2009; Leffler *et al.*, 2012). The influence of  $N_e$  on diversity simply reflects the fact that larger populations can store more genetic variation, while the second aspect, efficacy of selection, is driven by the link between  $N_e$  and genetic drift: the lower the  $N_e$ , the more genetic evolution is influenced by the random sampling of individuals over generations. As a result, long-term trends in  $N_e$  are expected to have an important impact on genome evolution (Lynch *et al.*, 2011) and, more generally, on the relative contribution of adaptive and non-adaptive forces in shaping macro-evolutionary patterns.

The nearly-neutral theory proposes a simple conceptual framework for formalizing the role of selection and drift on genetic sequences. According to this theory, genetic sequences are mostly under purifying selection; deleterious mutations are eliminated by selection, whereas neutral and nearly-neutral mutations are subject to genetic drift and can therefore segregate and reach fixation. The inverse of  $N_e$  defines the selection threshold under which genetic drift dominates. This results in specific quantitative relations between  $N_e$  and key molecular parameters (Ohta, 1995). In particular, species with small  $N_e$  are expected to have a higher ratio of nonsynonymous ( $d_N$ ) to synonymous ( $d_S$ ) substitution rates and a higher ratio of nonsynonymous ( $\pi_N$ ) to synonymous ( $\pi_S$ ) nucleotide diversity. Under certain assumptions, these two ratios are linked to  $N_e$  through allometric functions in which the scaling coefficient is directly related to the shape of the distribution of fitness effects (DFE) (Kimura, 1979; Welch *et al.*, 2008; Castellano *et al.*, 2018).

The empirical test of these predictions raises the problem that  $N_e$  is difficult to measure directly in practice. In principle,  $N_e$  could be estimated through demographic and census data. However, the relation between census and effective population size is far from straightforward. Consequently, many studies which have tried to test nearly-neutral theory have used proxies indirectly linked

to  $N_e$ . In particular, life history traits (LHT, essentially body mass or maximum longevity) are expected to correlate negatively with  $N_e$  (Waples *et al.*, 2013). As a result,  $d_N/d_S$  or  $\pi_N/\pi_S$  are predicted to correlate positively with LHT. This has been tested, leading to various outcomes, with both positive and negative results (Eyre-Walker *et al.*, 2002; Popadin *et al.*, 2007; Nikolaev *et al.*, 2007; Lartillot, 2013; Nabholz *et al.*, 2013; Romiguier *et al.*, 2014; Figuet *et al.*, 2016).

More direct estimations of  $N_e$  can be obtained from  $\pi_S$  since, in accordance with coalescent theory,  $\pi_S = 4N_e u$  (with  $u$  referring to the mutation rate per site per generation). Thus, one would predict a negative correlation of  $d_N/d_S$  or  $\pi_N/\pi_S$  with  $\pi_S$  and a positive correlation between LHT and  $\pi_S$ . Such predictions have been tested in several previous studies (Romiguier *et al.*, 2014; Figuet *et al.*, 2016), with encouraging results. However, these more specific tests of the nearly-neutral theory are only qualitative, at least in their current form, in which  $N_e$  is indirectly accessed through  $\pi_S$  without any attempt to correct for the confounding effect of the mutation rate  $u$  and its variation across species.

In this study, we aim to solve this problem by using a Bayesian integrative approach, in which the joint evolutionary history of a set of molecular and phenotypic traits is explicitly reconstructed along a phylogeny. This method has previously been used to test the predictions of the nearly-neutral theory via indirect proxies of  $N_e$  (Lartillot, 2013; Nabholz *et al.*, 2013). Here, we propose an elaboration on this approach, in which the variation in the mutation rate per generation  $u$  is globally reconstructed over the phylogeny by combining the relaxed molecular clock of the model with data about generation times. This in turns allows us to tease out  $N_e$  and  $u$  from the  $\pi_S$  estimates obtained in extant species, thus leading to a complete reconstruction of the phylogenetic history of  $N_e$  and of its scaling relations with others traits such as  $d_N/d_S$  or  $\pi_N/\pi_S$ . Using this reconstruction, we can conduct a proper quantitative test of some of the predictions of the nearly-neutral theory and then compare our findings with independent knowledge previously derived from

the analysis of site frequency spectra. The approach requires a multiple sequence alignment across a group of species, together with polymorphism data, ideally averaged over many loci to stabilize the estimates, as well as data about life-history traits in extant species and fossil calibrations. Here, we apply it to previously published phylogenetic and transcriptome data (Perelman *et al.*, 2011; Figuet *et al.*, 2016), focussing the analysis on primates, a group for which coding-sequence evolution has been suggested to be globally compatible with a nearly-neutral regime (Eyre-Walker & Keightley, 2009; Galtier, 2016).

## Results

### Life-history traits do not reflect effective population size in primates

Using an integrative comparative approach, based on a multivariate log-Brownian covariant model for rates and traits (Coevol, Lartillot & Poujol, 2011), we first tested the predictions of the nearly-neutral theory in primates, taking life history traits (age of sexual maturity, body mass, longevity and generation time, hereafter abbreviated as LHT) as tentative proxies for effective population size  $N_e$ . This first analysis gave limited insight into the problem. First,  $\pi_N/\pi_S$  does not correlate with any of the LHT. In the case of  $d_N/d_S$ , a significant positive correlation was observed only with longevity and generation time, whereas no correlation was seen with body mass. Finally, concerning  $\pi_S$ , only a marginally significant correlation with body mass was observed, which is surprisingly positive.

On the other hand, the correlations among molecular quantities are in agreement with the nearly-neutral predictions. Thus,  $d_N/d_S$  and  $\pi_N/\pi_S$  are positively correlated with each other, and both correlate negatively with  $\pi_S$  ( $r^2 = 0.741$  for  $\pi_N/\pi_S$  and  $0.449$  for  $d_N/d_S$ ). The somewhat weaker correlation of  $d_N/d_S$  with  $\pi_S$  could be due either to the presence of a minor fraction of

adaptive substitutions or, alternatively, to a discrepancy between the short-term effects reflected in both  $\pi_S$  and  $\pi_N/\pi_S$  and long-term trends captured by  $dN/dS$ .

The simplest interpretation of these contrasted results is that the nearly-neutral model is essentially valid for primates, except that there is just no clear correlation between effective population size and body size or other related life-history traits in this group. Possibly, the phylogenetic scale might be too small to show sufficient variation in LHT that would be interpretable in terms of variation in  $N_e$ . Alternatively,  $N_e$  might be driven by other life-history characters (in particular, the mating systems), which may not directly correlate with body size. Of note, even in those cases where the estimated correlation of  $dN/dS$  or  $\pi_N/\pi_S$  with LHTs were in agreement with the predictions of the nearly-neutral theory (Eyre-Walker *et al.*, 2002; Popadin *et al.*, 2007; Nikolaev *et al.*, 2007; Lartillot, 2013; Nabholz *et al.*, 2013; Romiguier *et al.*, 2014; Figuet *et al.*, 2016), the reported correlation strengths were often weak, weaker than the correlations found here and elsewhere directly between  $\pi_S$  and  $\pi_N/\pi_S$  and  $dN/dS$  (Romiguier *et al.*, 2014; Figuet *et al.*, 2016). The use of LHTs as an indirect proxy of  $N_e$  therefore appears to typically result in a substantial loss of power. In contrast, the more direct use of polymorphism data at the exome level seems promising.

## Teasing apart substitution rates, divergence times and effective population size

The correlation patterns shown by the three molecular quantities  $\pi_S$ ,  $dN/dS$  and  $\pi_N/\pi_S$  are sufficiently clearcut to lend themselves to a more direct and more quantitative formalization of the underlying population-genetic mechanisms. In order to achieve this, an explicit estimate of the key parameter  $N_e$ , and of its variation across species, is first necessary. In this direction, a first simple but fundamental equation relates  $\pi_S$  with  $N_e$ :

$$\pi_S = 4 N_e u. \quad (1)$$

In order to estimate  $N_e$  from equation 1, an estimation of  $u$  is also required. Here, it can be obtained by noting that:

$$u = r \tau, \quad (2)$$

where  $r$  is the mutation rate per site and per year and  $\tau$  the generation time. Assuming that synonymous mutations are neutral, we can identify the mutation rate with the synonymous substitution rate  $dS$ , thus leading to:

$$u = dS \tau. \quad (3)$$

Finally, combining equations 1 and 3 and taking the logarithm gives:

$$\ln N_e = \ln \pi_S - \ln dS - \ln \tau - \ln 4. \quad (4)$$

This expression suggests to operate a linear transformation on the three variables  $\ln \pi_S$ ,  $\ln dS$  and  $\ln \tau$ , all of which are jointly reconstructed across the tree by the Bayesian integrative framework used here, so as to obtain a direct phylogenetic reconstruction of  $\ln N_e$ . In addition, since the transformation is linear, the correlation patterns between  $\ln N_e$  and all other variables can be recovered by applying elementary matrix algebra to the covariance matrix estimated under the initial parameterization (see Materials and Methods).

The results of this linearly-transformed correlation analysis are gathered in Table 1. As predicted by the nearly-neutral theory,  $\pi_N/\pi_S$  and  $d_N/d_S$  are negatively correlated with  $N_e$ . Importantly, these two ratios correlate more strongly with our reconstructed  $N_e$  than with the originally observed  $\pi_S$  ( $r^2 = 0.767$  and  $r^2 = 0.501$  with  $N_e$ , against  $r^2 = 0.741$  and  $r^2 = 0.449$  with  $\pi_S$ ) – as expected if the correlation with  $\pi_S$  is mediated by  $N_e$ . This also suggests that the approach has successfully teased out  $u$  and  $N_e$  from  $\pi_S$ , giving more confidence about the reconstructed history of  $N_e$  returned by the method (see below).

## Estimating the shape parameter of the distribution of fitness effects

The quantitative scaling behavior of  $\pi_N/\pi_S$  and  $d_N/d_S$  as a function of  $N_e$  can be further investigated and interpreted in the light of an explicit mathematical model of the nearly-neutral regime. Such mathematical models, which are routinely used in modern Mac-Donald Kreitman tests (Charlesworth & Eyre-Walker, 2008; Eyre-Walker & Keightley, 2009; Halligan *et al.*, 2010; Galtier, 2016), formalize how demography modulates the detailed patterns of polymorphism and divergence. In turn, these modulations depend on the structure of the distribution of fitness effects (DFE) over non-synonymous mutations (Eyre-Walker & Keightley, 2007). Mathematically, the DFE is often modelled as a gamma distribution. The shape parameter of this distribution (usually denoted as  $\beta$ ) is classically estimated based on empirical synonymous and non-synonymous site frequency spectra. Typical estimates of the shape parameter are of the order of 0.2 in humans (Boyko *et al.*, 2008; Eyre-Walker *et al.*, 2006), thus suggesting a strongly leptokurtic distribution, with the majority of mutations having either very small or very large fitness effects.

Here, we approach the problem from a different direction. Instead of the site frequency spectrum within a given species, we use the interspecific allometry of  $dN/dS$  and  $\pi_N/\pi_S$  with  $N_e$  to estimate the shape parameter of the DFE. To this aim, we make use a theoretical result (Kimura, 1979; Welch *et al.*, 2008), showing that, when  $\beta$  is small, both  $\pi_N/\pi_S$  and  $d_N/d_S$  scale as a function of  $N_e$  as a power-law, with a scaling exponent equal to  $\beta$ :

$$\pi_N/\pi_S = \kappa_1 N_e^{-\beta}, \quad (5)$$

$$dN/dS = \kappa_2 N_e^{-\beta}. \quad (6)$$

In the present case, an estimation of this scaling parameter can easily be obtained, by just computing the slope of the correlation between  $\ln N_e$  and  $\ln \pi_N/\pi_S$  or  $\ln dN/dS$ , which is then predicted to be



equal to  $-\beta$ :

$$\ln dN/dS = -\beta \ln N_e + \ln \kappa_1, \quad (7)$$

$$\ln \pi_N/\pi_S = -\beta \ln N_e + \ln \kappa_2. \quad (8)$$

Of note, this specific relation with the shape of the DFE was used recently for analysing the impact of the variation in  $N_e$  along the genome in *Drosophila* (Castellano *et al.*, 2018).

As shown in Table 2, the resulting two estimates of  $\beta$  (based on  $dN/dS$  and  $\pi_N/\pi_S$ ) are congruent with each other, with point estimates at 0.1 and 0.15, respectively, and credible intervals ranging from 0.01 to 0.23. Thus, they are compatible with (although a bit lower than) previously reported independent estimates obtained from site frequency spectra (also reported in Table 2). This important result further consolidates both our phylogenetic reconstruction of  $N_e$  and the idea of an essentially nearly-neutral regime in primates.

## A mechanistic nearly-neutral phylogenetic codon model

Since all of the results presented thus far are compatible with a nearly-neutral regime, we decided to construct a mechanistic version of the model directly from first principles. Thus far, the whole set of variables of interest ( $dS$ ,  $dN/dS$ ,  $\pi_S$ ,  $\pi_N/\pi_S$  and generation-time  $\tau$ ) were jointly reconstructed along the phylogeny, as a multivariate log-normal Brownian process with 5 degrees of freedom. Here instead, only three degrees of freedom are considered (which could be taken as  $u$ ,  $N_e$  and  $\tau$ ), and then the empirically measurable molecular quantities  $dS$ ,  $dN/dS$ ,  $\pi_S$  and  $\pi_N/\pi_S$  are obtained as deterministic functions of these three fundamental variables, according to the equations introduced above (3, 4 and 7). The three structural parameters  $\beta$ ,  $\kappa_1$  and  $\kappa_2$  involved in these equations (which represent the constraints induced by the assumed DFE), are also estimated. In practice, the model is more conveniently expressed, via a log-linear change of variables, in terms of  $\pi_S$ ,  $\pi_N/\pi_S$  and  $\tau$  as the three free variables, since these are directly observed in extant primates – from which  $dS$ ,

$dN/dS$  and  $N_e$  are then derived deterministically (see Materials and Methods).

As a result of the reduction in the dimensionality of the Brownian process, this mechanistic model is more constrained than the previous version explored above (which is more phenomenological in spirit) and is thus expected to have more statistical power. Indeed, compared to its phenomenological counterpart, the mechanistic model yields a more focussed estimate of  $\beta$  (Table 2), with a posterior median at 0.23 and a credible interval equal to (0.19, 0.27). This is also closer to independent estimates obtained from site frequency spectra (Kimura, 1979; Welch *et al.*, 2008).

## Phylogenetic Reconstruction of $N_e$

The marginal reconstruction of the history of  $N_e$  along the phylogeny of primates returned by the mechanistic model introduced in the last section is shown in Figure 1. More detailed information, with credible intervals, is given in Table 3 for several species of interest and key ancestors along the phylogeny.

$N_e$  estimates for the four extant Hominidae (*Homo*, *Pan*, *Gorilla* and *Pongo*) are globally congruent with independent estimates based on other coalescent-based approaches (Prado-Martinez *et al.*, 2013). In particular, for Humans,  $N_e$  is estimated to be between 13 000 and 24 000. Concerning the successive last common ancestors along the hominid subtree, our estimation is also consistent with the independent-locus multi-species coalescent (Rannala & Yang, 2003), giving both similar point estimates and comparable credible intervals (in the range of 25 000 to 100 000 for the three ancestors). On the other hand, the pSMC approach (Li & Durbin, 2011), such as used in Prado-Martinez *et al.* (2013), tends to give systematically lower estimates for extant species and systematically higher estimates for ancestors, compared to both our approach (table 3) and the independent-locus multi-species coalescent (Rannala & Yang, 2003).

Zooming out over the entire primate phylogeny, we observe that, starting with a point estimate

at around 100 000 in the last common ancestor of primates,  $N_e$  then goes down in Haplorrhini, stabilizing at around 80 000 in Cercopithecidae, 40 000 in Hominoidea (going further down more specifically in Humans), and 40 000 in Platyrrhini (old-world monkeys). Conversely, in Strepsirrhini,  $N_e$  tends to show higher values, staying at 100 000 in Lemnidae and going up to 160 000 to 200 000 in Lorisiformes. Finally, large effective sizes are estimated for the two isolated species *Tarsius* (300 000) and *Daubentonia* (greater than  $10^6$ ) – although these latter estimates may not be so reliable, owing to the very long branches leading to these two species.

The reconstruction of  $N_e$  shown in figure 1 mirrors the patterns of  $dN/dS$  estimated over the tree (supplementary figure 1). Thus,  $dN/dS$  starts in the range of 0.25 in the early primate lineages. On the side of Haplorrhini, it goes up to 0.30 in Simiiformes (monkeys), stabilizes around this value in Catarrhini (old-world monkeys), goes further up to 0.32 in Platyrrhini (new-world monkeys). On the other branch (Strepsirrhini), the  $dN/dS$  is around the value of 0.25 in Lemnidae, versus 0.22 in Loridae. The two species *Daubentonia* and *Tarsius* show the lowest  $dN/dS$  values (around 0.20).

In order to get some insight about how much  $dN/dS$  and  $\pi_N/\pi_S$  inform the reconstructed history of  $N_e$ , an alternative version of the model was also explored, in which all time-dependent variables are assumed to evolve independently from each other. Under this control,  $N_e$  is thus only informed at the tips by  $\pi_S = 4N_e u$  and by the estimates of  $u$  implied by the relaxed clock and data about generation times. Compared to the mechanistic version just presented, this uncoupled model gives a globally similar result in terms of point estimation (supplementary figures 2), except for Lemnidae, which show globally higher  $N_e$  estimates than Lorisiformes (whereas the converse was true under the model informed by  $dN/dS$ ) and a lower  $N_e$  in the last common ancestor of primates (40 000, versus 100 000 under the integrative model), as well as in the two species *Daubentonia* and *Tarsius*. The deviations between the two models give some insight about the respective roles

of  $\pi_S$  and  $dN/dS$  in informing the reconstruction. In the case of Strepsirrhini,  $\pi_S$  is globally higher in two of the three Lemnuroidae for which polymorphism data are available (*Propithecus* and *Varecia*) than in the two Lorisiformes *Galago* and *Nyctecibus*. In contrast,  $dN/dS$  is globally lower in Lorisiformes than in Lemnuroidae. Thus, the two sources of molecular information tend to locally contradict each other in this case. Concerning *Daubentonia* and *Tarsius*, no information about  $\pi_S$  is available, but the  $dN/dS$  is particularly low for these two species, which explains their particularly high  $N_e$  estimates specifically under the reconstruction informed by  $dN/dS$ . Finally, the reconstruction under the phenomenological version of the model gives an intermediate picture (supplementary figure 3), showing the patterns that are in common between the mechanistic and the uncoupled versions of the model such as just described (i.e. a higher  $N_e$  in Strepsirrhini, a lower  $N_e$  in Haplorrhini and more particularly in Platyrrhini), while striking a compromise between the opposite signals of  $\pi_S$  and  $dN/dS$  in Strepsirrhini by estimating a similar range of effective population sizes in Lorisiformes and Lemnuroidae.

Interestingly, under the uncoupled model, there is a substantial uncertainty about the estimation of the instant values of  $N_e$  across all nodes of the tree: the 95% credible intervals span one order of magnitude on average. This uncertainty is somewhat reduced under the reconstructions relying on the additional information contributed by  $dN/dS$  and  $\pi_N/\pi_S$ , quantitatively, by 30% under the phenomenological, and by 50% under the mechanistic covariant models. In the end, there is thus on average a factor 5 between the lower and the upper bound of the 95% credible intervals on  $N_e$  estimates under the most constrained (mechanistic) model. Concerning the deep branches of the tree, most of this reduction in uncertainty is primarily contributed by  $dN/dS$  – which thus gives an idea of how much information can be extracted from multiple sequence alignments about very ancient population genetic regimes.

## Discussion

In population genetics, effective population size ( $N_e$ ) plays two different roles. First,  $N_e$  directly determines how much genetic diversity can be maintained in a given population. Second, its inverse,  $1/N_e$ , defines the relative strength of random drift, compared to selection. Quantitatively, the first role of  $N_e$  is reflected in the synonymous nucleotide diversity  $\pi_S = 4N_e u$ . However, as can be seen from this equation, diversity also depends on the mutation rate  $u$  per generation. A first key result obtained here, through an integrative dating and comparative analysis, is a separate estimation of  $N_e$  and  $u$  from  $\pi_S$ , thus leading to a quantitative reconstruction of the history of  $N_e$  along the phylogeny of primates.

As for the second role of  $N_e$ , it is reflected in the two ratios of non-synonymous over synonymous polymorphism ( $\pi_N/\pi_S$ ) and divergence ( $d_N/d_S$ ). Under relatively mild assumptions, the nearly-neutral theory predicts that these two quantities should decrease with  $N_e$ , according to a power-law with a scaling coefficient equal to the shape parameter of the distribution of fitness effects (Kimura, 1979; Welch *et al.*, 2008). Another key result obtained in the present work is a test of the validity of those predictions of the nearly-neutral theory, leading to an estimate of the scaling coefficient of the order of 0.2, thus compatible with previous estimates based on site frequency spectra (Boyko *et al.*, 2008; Eyre-Walker *et al.*, 2006). Altogether, our results therefore confirm previous findings from empirical population genetics and suggest that primate coding sequences are essentially evolving under a nearly-neutral regime.

Our model-based inference is potentially subject to several sources of bias. First, it depends on a sufficiently accurate estimation of the mutation rate  $u$ , which is itself obtained via the dating component of the model. Molecular dating is known to be sensitive to the exact assumptions of the dating model, in particular the prior on divergence times and fossil calibrations (Inoue *et al.*, 2010). Another potential issue is that short-term  $N_e$  (such as reflected by  $\pi_S$ ) may be strongly

dependent on recent demographic events (Charlesworth, 2009) and may thus not be identical with long-term  $N_e$  (such as reflected by  $d_N/d_S$ ). This might be one of the reasons why  $d_N/d_S$  shows a weaker correlation with  $\pi_S$  than  $\pi_N/\pi_S$  (Table 1). A possible improvement of our model in this direction would consist in allowing for an additional level of variability at the leaves, representing the mismatch between long- and short-term  $N_e$ .

Finally, the  $dN/dS$  may contain a fraction of adaptative substitutions, susceptible to distort the relation between  $dN/dS$  and  $N_e$ . Although a relatively minor problem in the case of primates (Eyre-Walker & Keightley, 2009; Galtier, 2016), adaptive substitutions might be a far more important issue when applying the method to other phylogenetic groups. Here also, the model could be further elaborated, by explicitly including an adaptive component to the total  $dN/dS$ . Quite interestingly, the resulting model could then be seen as an integrative multi-species version of the Mac-Donald Kreitman test, returning an estimate of the history of the adaptive substitution rate over the phylogeny – which could then be compared with independent estimates based on pairs of sister species (Charlesworth & Eyre-Walker, 2008; Eyre-Walker & Keightley, 2009; Halligan *et al.*, 2010; Galtier, 2016).

Thus, overall, further developments are needed, and there are several reasons to be cautious. Nevertheless, the phylogenetic history of  $N_e$  obtained here provides a first synthetic picture about the evolution of  $N_e$  at the scale of an entire mammalian order. What this image suggests in the present case (Figure 1) is that  $N_e$  stays within a 10-fold range across primates (roughly between 20 000 and 200 000), with a simple structure at the sub-order / super-family level (higher values in Strepsirrhini and lower values in Haplorrhini, particularly in Hominoidea and, less expectedly, in Platyrrhini). Such broad-scale reconstructions, as opposed to focussed estimates in isolated species using coalescent-based methods, are potentially useful in several respects. First, they provide a basis for further testing some of the key ideas about the role of genetic drift in genome evolution

(Lynch *et al.*, 2011). Second, the integrative framework could be augmented with trait-dependent diversification models (Fitzjohn, 2010), so as to examine the role of  $N_e$  in speciation and extinction patterns. Finally, the underlying codon model could be further elaborated (Rodrigue *et al.*, 2010; De Maio *et al.*, 2013), so as to achieve a more complete integration of polymorphism and divergence in model-based molecular evolutionary studies (Hernandez *et al.*, 2011).

## Materials & Methods

### Coding sequence data, phylogenetic tree and fossil calibration

The coding sequences were taken from Perelman *et al.* (2011) and modified. It consists in a modified subset, codon compliant, based on 54 nuclear autosomal genes in 61 species of primates, and of a total length 15.9 kb. We used the tree topology published by Perelman *et al.* (itself based on a maximum likelihood analysis), as well as the eight fossil calibrations that were used in this previous study to estimate divergence times. These calibrations were encoded as hard constraints on the molecular dating analysis.

### Life History Traits

We used four life history traits (LHT) in this study. Adult body mass (as a proxy for body mass, 16 missing values), maximum recorded lifespan (ML, as a proxy for longevity, 19 missing values) and female age of sexual maturity (ASM, 26 missing values) were obtained from the AnAge database (de Magalhaes & Costa, 2009). Generation time ( $\tau$ ) was calculated from maximum longevity and age at maturity following a method detailed by UICN (Pacifi *et al.*, 2013):

$$\tau = ML \times 0.29 + ASM.$$

## Estimation of Polymorphism ( $\pi_S$ and $\pi_N/\pi_S$ )

The estimates of the synonymous nucleotide diversity  $\pi_S$  and the ratio of non-synonymous over synonymous diversity  $\pi_N/\pi_S$  and  $\pi_S$  of 9 primate species were obtained from Figuet *et al.* (2016). For each species, estimates were based on 4 individuals. We matched the polymorphism data reported by Figuet et al for the three species *Pan troglodytes*, *Propithecus verreauxi coquereli* and *Eulemur mongoz*, to *Pan paniscus*, *Propithecus verreauxi* and *Eulemur rufus*, respectively, from the Perelman et al multiple sequence alignment. Of note,  $\pi_S$  and  $\pi_N/\pi_S$  were estimated in Figuet et al on different subset of genes / contigs, so as to avoid the artifactual correlations that would be induced between these two parameters by shared data sampling error.

## Models

### General Principles of the integrative strategy (Coevol)

Coevol is a Bayesian inference software program based on a comparative approach applied to molecular data (Lartillot & Poujol, 2011). The principal aims of this program are to estimate ancestral continuous traits and to determine the correlations between the different molecular parameters along a phylogeny. Coevol follows a generative modeling strategy to describe the evolution of continuous traits along a phylogenetic tree. The joint evolutionary process followed by traits is modeled as a log-Brownian process. This process is parameterized by a variance-covariance matrix, which thus captures the correlations between traits corrected for phylogenetic inertia. Sequence evolution is described by a codon model (with a separate evolution of  $d_S$  and  $d_N/d_S$  along the tree). The model is conditioned on data obtained in current species (multiple sequence alignments and quantitative traits), with fossil calibrations, and samples from the joint posterior distribution are obtained by Markov Chain Monte-Carlo (MCMC). The analysis returns an estimation of correlation patterns between traits (covariance matrix) and a reconstruction of the history of the traits



along the phylogeny.

## Ex-post log-linear transformation of the correlation analysis

As a first step, we ran the original model (such as defined by the current version of Coevol), which we call the *phenomenological* model in the following. We then used the outputs from these runs to estimate  $N_e$  and its correlation patterns with other traits. At any given time, the multivariate Brownian process is structured as follows:

$$\left\{ \begin{array}{l} X_1 = \ln dS \\ X_2 = \ln dN/dS \\ X_3 = \ln \tau \\ X_4 = \ln \pi_S \\ X_5 = \ln \pi_N/\pi_S \\ \dots \end{array} \right.$$

Where  $\tau$  is the generation time and entries  $X_i$  for  $i > 5$  correspond to all other LHT. Using equation 4, which gives  $\ln N_e$  as a linear combination of the components of the Brownian process, we can define the following linear change of variables:

$$X = \begin{pmatrix} \ln dS \\ \ln dN/dS \\ \ln \tau \\ \ln \pi_S \end{pmatrix} \rightarrow Y = \begin{pmatrix} \ln dS \\ \ln dN/dS \\ \ln \tau \\ \ln N_e \end{pmatrix}$$

where

$$Y_4 = X_4 - X_1 - X_3 + K,$$

where  $K$  is a numerical constant (depending on the absolute time scale). So, if we define the matrix  $A$ :

$$A = \begin{pmatrix} 0 & 0 & 0 & 0 \\ 0 & 0 & 0 & 0 \\ 0 & 0 & 0 & 0 \\ -1 & 0 & -1 & 1 \end{pmatrix}$$

then  $Y = AX + K$ . Finally, since  $X$  follows a Brownian process (parameterized by a variance-covariance matrix  $\Sigma_X$ ), according to elementary multivariate normal theory,  $Y$  follows a Brownian process parameterized by a variance-covariance matrix  $\Sigma_Y = A \times \Sigma_X \times A^{-1}$ . In practice, we added a new method in Coevol to read the output and apply the linear transformation (from  $X$  and  $\Sigma_X$  to  $Y$  and  $\Sigma_Y$ ) on each sample from the posterior distribution. This allows us to produce a reconstruction of  $N_e$  (posterior mean, credible intervals) and of the correlation matrix  $\Sigma_Y$ .

### Mechanistic Nearly-Neutral Model

This alternative model uses the original Coevol framework but introduces additional constraints, such that some of the parameters are deduced through deterministic relations implying other Brownian dependent parameters. Specifically, the Brownian free variables are now:

$$\begin{cases} X_1 &= \ln \pi_S \\ X_2 &= \ln \pi_N / \pi_S \\ X_3 &= \ln \tau \end{cases}$$

Then, using equations 3, 4 and 7, the other variables of interest can be expressed as deterministic functions:

$$\begin{cases} \ln N_e &= -1/\beta (\ln \pi_N / \pi_S + \ln \kappa_2), \\ \ln dS &= \ln \pi_S - \ln 4N_e - \ln \tau, \\ \ln dN/dS &= -\beta \ln N_e + \ln \kappa_1. \end{cases}$$

This model has three structural free parameters,  $\beta$ ,  $\kappa_1$  and  $\kappa_2$ , which were each endowed with a normal prior, of mean 0 and variance 1.

## Uncoupled Model

The *uncoupled* model, already implemented in Coevol, is similar to the phenomenological version of the model, except that the variables of interest ( $dS$ ,  $dN/dS$ ,  $\pi_S$ ,  $\pi_N/\pi_S$  and  $\tau$ ) are modelled as independent Brownian processes along the tree. Equivalently, we use a multivariate Brownian model with a diagonal covariance matrix (see Lartillot and Poujol, 2011, for details).

All these additional models and outputs were written in C++, as addition to the Coevol software programming environment. The original source code, as well as the modifications introduced for the present study, are available on github: <https://github.com/bayesiancook/coevol>.

## Markov Chain Monte-Carlo (MCMC) and post-analysis

At least two independent chains were run under each model configuration. Convergence of the chains was first checked visually (a burnin of approximately 10% of the total run was chosen) and quantified using Coevol's program Tracecomp (effective sample size greater than 200 and maximum discrepancy smaller than 0.2 across all pairs of runs and across all statistics). We used the posterior median as the point estimate. The statistical support for correlations is assessed in terms of the posterior probability of a positive or a negative correlation. Correlation slopes are estimated using the major axis method. The slope is estimated for each covariance matrix sampled from the distribution, which then gives a sample from the marginal posterior distribution over the slope.

# Software and data availability

Coevol (Lartillot & Poujol, 2011) is an open source program available from [github.com/bayesiancook/coevol.git](https://github.com/bayesiancook/coevol.git).

All models and data used here are accessible through the branch coevolNe.

# Authors contribution

All modifications of Coevol and new models made in this study are attributable to MB, who also gathered and formatted the data and conducted all analyses, in the context of an internship (master Biosciences of École Normale Supérieure de Lyon). MB and NL both contributed to the writing of the manuscript.

# Competing interests

The Authors have no competing interests.

# Acknowledgements

We wish to thank Emeric Figuet and Nicolas Galtier for sharing polymorphism data (PopPhyl project), Emmanuel Douzery and Frederic Delsuc for editing the multiple sequence alignment of Perelman et al to make it codon-compliant, and Laurent Duret and Thibault Latrille for their input on this work and their comments on the manuscript. Phylogenetic analyses were conducted using the computing facilities of the CC LBBE/PRABI.

# Funding

French National Research Agency, Grant ANR-15-CE12-0010-01 / DASIRE.

# References

- Boyko, A. R., Williamson, S. H., Indap, A. R., Degenhardt, J. D., Hernandez, R. D., Lohmueller, K. E., Adams, M. D., Schmidt, S., Sninsky, J. J. *et al.* 2008 Assessing the evolutionary impact of amino acid mutations in the human genome. *PLoS Genet.*, **4**(5), e1000083.
- Castellano, D., James, J. & Eyre-Walker, A. 2018 Nearly Neutral Evolution across the *Drosophila melanogaster* Genome. *Mol. Biol. Evol.*, **35**(11), 2685–2694.
- Charlesworth, B. 2009 Fundamental concepts in genetics: effective population size and patterns of molecular evolution and variation. *Nat. Rev. Genet.*, **10**(3), 195–205.
- Charlesworth, J. & Eyre-Walker, A. 2008 The McDonald-Kreitman test and slightly deleterious mutations. *Mol. Biol. Evol.*, **25**(6), 1007–1015.
- de Magalhaes, J. & Costa, J. 2009 A database of vertebrate longevity records and their relation to other life-history traits. *J. Evol. Biol.*, **22**, 1770–1774.
- De Maio, N., Schlötterer, C. & Kosiol, C. 2013 Linking great apes genome evolution across time scales using polymorphism-aware phylogenetic models. *Mol. Biol. Evol.*, **30**(10), 2249–2262.
- Eyre-Walker, A. & Keightley, P. D. 2007 The distribution of fitness effects of new mutations. *Nat. Rev. Genet.*, **8**(8), 610–618.
- Eyre-Walker, A. & Keightley, P. D. 2009 Estimating the rate of adaptive molecular evolution in the presence of slightly deleterious mutations and population size change. *Mol. Biol. Evol.*, **26**(9), 2097–2108.
- Eyre-Walker, A., Keightley, P. D., Smith, N. G. C. & Gaffney, D. 2002 Quantifying the slightly deleterious mutation model of molecular evolution. *Mol. Biol. Evol.*, **19**(12), 2142–2149.
- Eyre-Walker, A., Woolfit, M. & Phelps, T. 2006 The distribution of fitness effects of new deleterious amino acid mutations in humans. *Genetics*, **173**(2), 891–900.
- Figuet, E., Nabholz, B., Bonneau, M., Mas Carrio, E., Nadachowska-Brzyska, K., Ellegren, H. & Galtier, N. 2016 Life History Traits, Protein Evolution, and the Nearly Neutral Theory in Amniotes. *Mol. Biol. Evol.*
- Fitzjohn, R. G. 2010 Quantitative traits and diversification. *Syst. Biol.*, **59**(6), 619–633.
- Galtier, N. 2016 Adaptive Protein Evolution in Animals and the Effective Population Size Hypothesis. *PLoS Genet.*, **12**(1), e1005774.
- Halligan, D. L., Oliver, F., Eyre-Walker, A., Harr, B. & Keightley, P. D. 2010 Evidence for pervasive adaptive protein evolution in wild mice. *PLoS Genet.*, **6**(1), e1000825.
- Hernandez, R. D., Andolfatto, P. & Przeworski, M. 2011 A population genetics-phylogenetics approach to inferring natural selection in coding sequences. *PLoS Genet.*, **7**(12).

- Inoue, J., Donoghue, P. C. J. & Yang, Z. 2010 The impact of the representation of fossil calibrations on Bayesian estimation of species divergence times. *Syst. Biol.*, **59**(1), 74–89.
- Kimura, M. 1979 Model of effectively neutral mutations in which selective constraint is incorporated. *Proc. Natl. Acad. Sci. USA*, **76**(7), 3440–3444.
- Lartillot, N. 2013 Interaction between Selection and Biased Gene Conversion in Mammalian Protein-Coding Sequence Evolution Revealed by a Phylogenetic Covariance Analysis. *Mol. Biol. Evol.*, **30**(2), 356–368.
- Lartillot, N. & Poujol, R. 2011 A phylogenetic model for investigating correlated evolution of substitution rates and continuous phenotypic characters. *Mol. Biol. Evol.*, **28**(1), 729–744.
- Leffler, E. M., Bullaughey, K., Matute, D. R., Meyer, W. K., Ségurel, L., Venkat, A., Andolfatto, P. & Przeworski, M. 2012 Revisiting an old riddle: what determines genetic diversity levels within species? *PLoS Biol.*, **10**(9), e1001388.
- Li, H. & Durbin, R. 2011 Inference of human population history from individual whole-genome sequences. *Nature*, **475**(7357), 493–496.
- Lynch, M., Bobay, L.-M., Catania, F., Gout, J.-F. & Rho, M. 2011 The repatterning of eukaryotic genomes by random genetic drift. *Annu Rev Genomics Hum Genet.*, **12**, 347–366.
- Nabholz, B., Uwimana, N. & Lartillot, N. 2013 Reconstructing the phylogenetic history of long-term effective population size and life-history traits using patterns of amino acid replacement in mitochondrial genomes of mammals and birds. *Genome Biol. Evol.*, **5**(7), 1273–1290.
- Nikolaev, S. I., Montoya-Burgos, J. I., Popadin, K., Parand, L., Margulies, E. H., National Institutes of Health Intramural Sequencing Center Comparative Sequencing Program & Antonarakis, S. E. 2007 Life-history traits drive the evolutionary rates of mammalian coding and noncoding genomic elements. *Proc. Natl. Acad. Sci. USA*, **104**(51), 20443–20448.
- Ohta, T. 1995 Synonymous and nonsynonymous substitutions in mammalian genes and the nearly neutral theory. *J. Mol. Evol.*, **40**, 56–63.
- Pacifici, M., Santini, L., Di Marco, M. & Baisero, D. 2013 Generation length for mammals. *Nature*.
- Perelman, P., Johnson, W. E., Roos, C., Seuánez, H. N., Horvath, J. E., Moreira, M. A. M., Kessing, B., Pontius, J., Roelke, M. *et al.* 2011 A Molecular Phylogeny of Living Primates. *PLoS Genet.*, **7**(3), e1001342.
- Popadin, K., Polishchuk, L., Mamirova, L., Knorre, D. & Gunbin, K. 2007 Accumulation of slightly deleterious mutations in mitochondrial protein-coding genes of large versus small mammals. *Proc. Natl. Acad. Sci. USA*, **104**(33), 13390.
- Prado-Martinez, J., Sudmant, P. H., Kidd, J. M., Li, H., Kelley, J. L., Lorente-Galdos, B., Veeramah, K. R., Woerner, A. E., O'Connor, T. D. *et al.* 2013 Great ape genetic diversity and population history. *Nature*, **499**(7459), 471–475.
- Rannala, B. & Yang, Z. 2003 Bayes estimation of species divergence times and ancestral population sizes using DNA sequences from multiple loci. *Genetics*, **164**(4), 1645–1656.

- Rodrigue, N., Philippe, H. & Lartillot, N. 2010 Mutation-selection models of coding sequence evolution with site-heterogeneous amino acid fitness profiles. *Proc. Natl. Acad. Sci. USA*, **107**(10), 4629–4634.
- Romiguier, J., Gayral, P., Ballenghien, M., Bernard, A., Cahais, V., Chenuil, A., Chiari, Y., Darnat, R., Duret, L. *et al.* 2014 Comparative population genomics in animals uncovers the determinants of genetic diversity. *Nature*.
- Waples, R. S., Luikart, G., Faulkner, J. R. & Tallmon, D. A. 2013 Simple life-history traits explain key effective population size ratios across diverse taxa. *Proc. Roy. Soc. London Ser. A*, **280**(1768), 20131 339.
- Welch, J. J., Eyre-Walker, A. & Waxman, D. 2008 Divergence and polymorphism under the nearly neutral theory of molecular evolution. *J. Mol. Evol.*, **67**(4), 418–426.

## Tables

Table 1. Correlation coefficients between  $dS$ ,  $dN/dS$ ,  $\pi S$ ,  $\pi N/\pi S$ ,  $N_e$  and life-history traits.

| cov.          | $d_S$ | $d_N/d_S$ | Mat.   | Mass    | Longev. | $\pi_S$ | $\pi_N/\pi_S$ | Gen.    | $N_e$   |
|---------------|-------|-----------|--------|---------|---------|---------|---------------|---------|---------|
| $d_S$         | 0.973 | 0.0825    | -0.394 | -1.38** | -0.213  | -0.841* | 0.241*        | -0.243  | -1.57** |
| $d_N/d_S$     | ...   | 0.095     | 0.0543 | 0.069   | 0.134** | -0.25** | 0.0701*       | 0.119** | -0.45** |
| Maturity      | ...   | ...       | 0.876  | 1.38**  | 0.382** | 0.203   | 0.0129        | 0.455** | 0.141   |
| Mass          | ...   | ...       | ...    | 5.19    | 0.886** | 1.14*   | -0.231        | 0.955** | 1.56    |
| Longevity     | ...   | ...       | ...    | ...     | 0.518   | -0.224  | 0.0607        | 0.489** | -0.5    |
| $\pi_S$       | ...   | ...       | ...    | ...     | ...     | 1.51    | -0.40**       | -0.148  | 2.49**  |
| $\pi_N/\pi_S$ | ...   | ...       | ...    | ...     | ...     | ...     | 0.139         | 0.0517  | -0.69** |
| Gen. Time     | ...   | ...       | ...    | ...     | ...     | ...     | ...           | 0.479   | -0.384  |
| $N_e$         | ...   | ...       | ...    | ...     | ...     | ...     | ...           | ...     | 4.45    |

  

| $r^2$         | $d_S$ | $d_N/d_S$ | Mat.   | Mass    | Longev. | $\pi_S$ | $\pi_N/\pi_S$ | Gen.    | $N_e$   |
|---------------|-------|-----------|--------|---------|---------|---------|---------------|---------|---------|
| $d_S$         | ...   | 0.0724    | 0.179  | 0.377** | 0.0894  | 0.489*  | 0.428*        | 0.126   | 0.557** |
| $d_N/d_S$     | ...   | ...       | 0.0449 | 0.0139  | 0.383** | 0.449** | 0.394*        | 0.331** | 0.501** |
| Maturity      | ...   | ...       | ...    | 0.411** | 0.316** | 0.0262  | 0.0025        | 0.487** | 0.00377 |
| Mass          | ...   | ...       | ...    | ...     | 0.286** | 0.154*  | 0.0635        | 0.36**  | 0.0967  |
| Longevity     | ...   | ...       | ...    | ...     | ...     | 0.0676  | 0.0581        | 0.964** | 0.105   |
| $\pi_S$       | ...   | ...       | ...    | ...     | ...     | ...     | 0.741**       | 0.0331  | 0.929** |
| $\pi_N/\pi_S$ | ...   | ...       | ...    | ...     | ...     | ...     | ...           | 0.0462  | 0.767** |
| Gen. Time     | ...   | ...       | ...    | ...     | ...     | ...     | ...           | ...     | 0.0671  |

Asterisks indicate strength of support (\*  $pp > 0.95$ , \*\*  $pp > 0.975$ ).



Table 2. Alternative estimates of the shape parameter  $\beta$  of the distribution of fitness effects.

| method                                   | point estimate | credible/confidence interval |
|------------------------------------------|----------------|------------------------------|
| phenomenological model ( $dN/dS$ )       | 0.11           | (0.01, 0.21)                 |
| phenomenological model ( $\pi N/\pi S$ ) | 0.16           | (0.07, 0.23)                 |
| mechanistic model                        | 0.25           | (0.19, 0.28)                 |
| Eyre-Walker et al                        | 0.23           | (0.19, 0.27)                 |
| Boyko et al                              | 0.18           | (0.16, 0.21)                 |

Table 3. Estimates of effective population size ( $\times 10^{-3}$ , posterior median and 95% credible interval) for several extant and ancestral species.

| species               | phenomenological | mechanistic  | uncoupled    | coalescent <sup>a</sup> | m.sp. coal <sup>b</sup> | coalHMM <sup>c</sup> |
|-----------------------|------------------|--------------|--------------|-------------------------|-------------------------|----------------------|
| <i>Homo</i>           | 19 (13,26)       | 14 (9,23)    | 13 (9,21)    | (13,16)                 |                         | 8                    |
| <i>Pan</i>            | 44 (36,55)       | 72 (50,106)  | 66 (43,109)  | (31,69)                 |                         | 30                   |
| <i>Gorilla</i>        | 68 (26,163)      | 106 (34,327) | 41 (18,100)  | (28,57)                 |                         | 21                   |
| <i>Pongo</i>          | 38 (15,91)       | 47 (19,124)  | 35 (11, 116) | (42,85)                 |                         | 19                   |
| <i>Homo - Pan</i>     | 39 (24,64)       | 44 (25,82)   | 34 (21, 56)  |                         | (10,47)                 | 50                   |
| <i>Homo - Gorilla</i> | 43 (24,72)       | 40 (25,99)   | 36 (21,63)   |                         | (27,61)                 | 47                   |
| <i>Homo - Pongo</i>   | 44 (21,81)       | 54 (26,127)  | 47 (21,108)  |                         |                         | 125                  |
| Hominoidae            | 55 (19,69)       | 77 (34,206)  | 58 (24, 149) |                         |                         |                      |
| Cercopithecidae       | 79 (44,145)      | 84 (40,171)  | 72 (34, 152) |                         |                         |                      |
| Catarrhini            | 74 (37,142)      | 76 (32,189)  | 58 (25,141)  |                         |                         |                      |
| Platyrrhini           | 37 (19,69)       | 30 (15,61)   | 32 (13,82)   |                         |                         |                      |
| Simiiformes           | 59 (28,123)      | 39 (14,100)  | 36 (14,98)   |                         |                         |                      |
| Haplorrhini           | 90 (39,230)      | 33 (8,111)   | 33 (11,121)  |                         |                         |                      |
| Lorisiformes          | 143 (68,348)     | 50 (13,151)  | 50 (19,135)  |                         |                         |                      |
| Lemuroidae            | 91 (41,195)      | 77 (27,205)  | 126 (50,322) |                         |                         |                      |
| Strepsirrhini         | 102 (43,262)     | 28 (59,100)  | 33 (12,109)  |                         |                         |                      |
| Primates              | 93 (38,229)      | 29 (66,99)   | 32 (11,115)  |                         |                         |                      |

<sup>a</sup> from Prado-Martinez et al, 2013, table 1

<sup>b</sup> from Rannala and Yang, 2003

<sup>c</sup> from Prado-Martinez et al, 2013, figure 2

## Figure

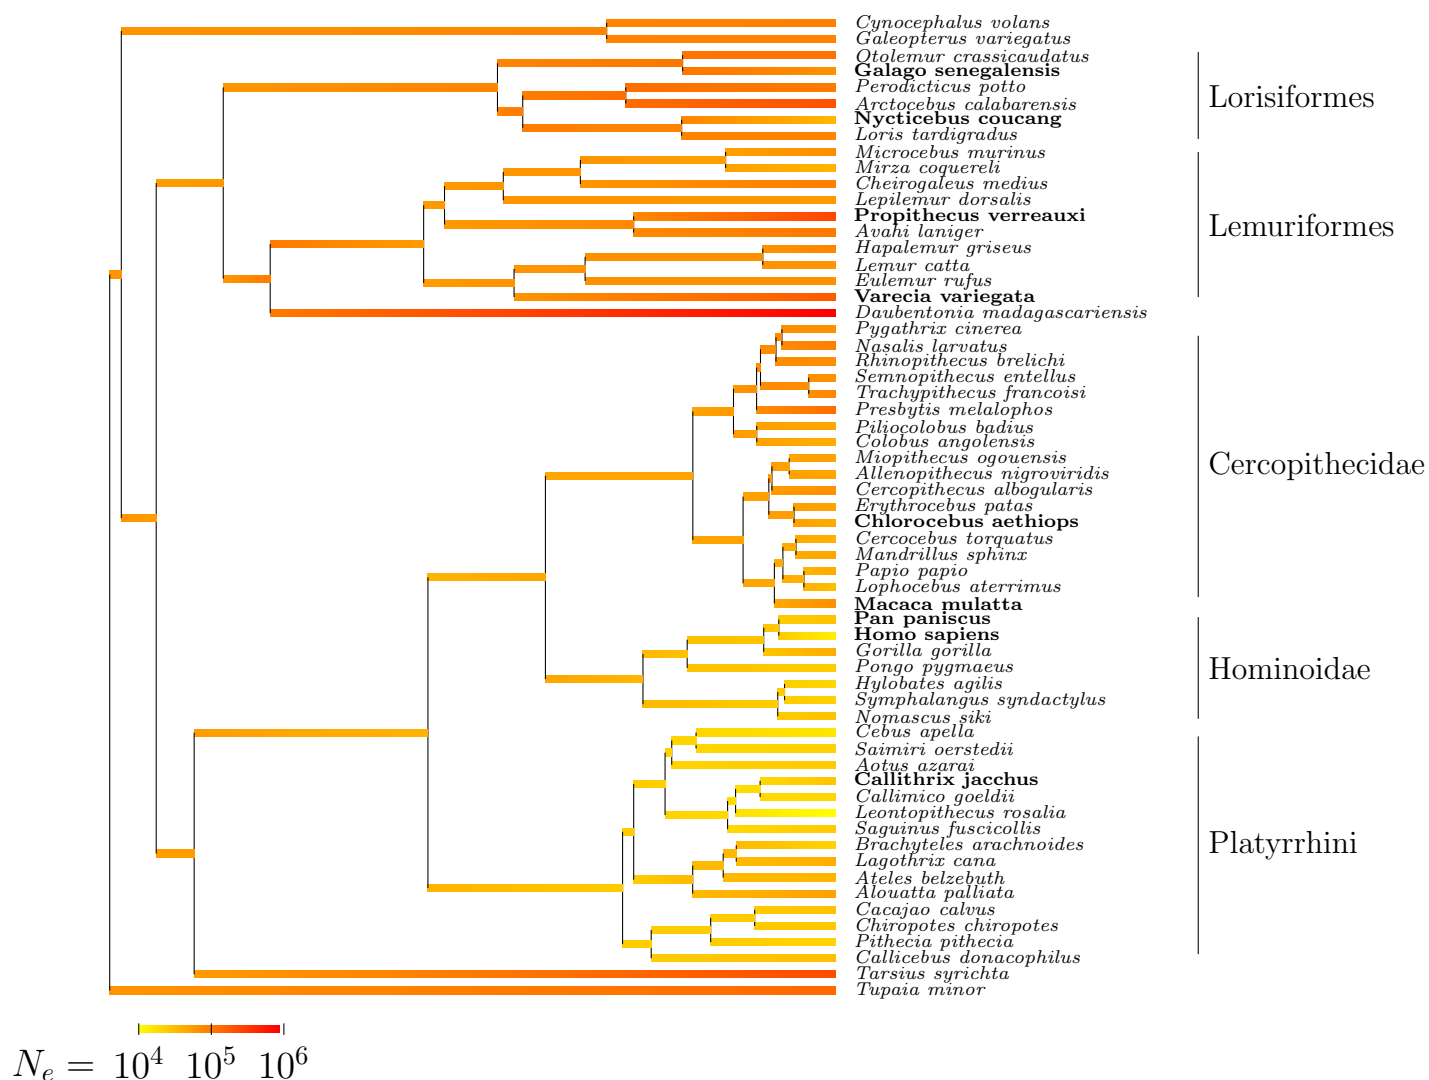

Figure 1. Reconstructed phylogenetic history of  $N_e$  (posterior median estimate) under the mechanistic nearly-neutral model. Species for which transcriptome-wide polymorphism data were used are indicated in bold face.
