# Supplementary material for: Reconstructing the history of variation in effective population size along phylogenies
Source: bioRxiv or medRxiv preprint supplement (doi:10.1101/793059), 2021-06-06
Supplement: Supplementary file [file media-1.pdf]

# Reconstructing the history of variation in effective population size along phylogenies.

Mathieu Brevet<sup>1</sup>, Nicolas Lartillot<sup>2</sup>

<sup>1</sup> *Station d'écologie théorique et expérimentale UMR 5321, 09200 Moulis, France.*

<sup>2</sup> *Université Lyon 1, CNRS, UMR 5558, Laboratoire de Biométrie et Biologie Evolutive.*

`nicolas.lartillot@univ-lyon1.fr`

**Running head:** A phylogenetic history of  $N_e$

Table S1. Correlation coefficients between  $dS$ ,  $dN/dS$ ,  $\pi_S$ ,  $\pi_N/\pi_S$ , life-history traits and  $N_e$  under a uniform prior over divergence times.

|               | $dS$ | $dN/dS$ | Maturity | Mass    | Longevity | $\pi_S$ | $\pi_N/\pi_S$ | Gen. time | $N_e$   |
|---------------|------|---------|----------|---------|-----------|---------|---------------|-----------|---------|
| $dS$          |      | 0.27    | -0.33    | -0.57** | -0.20     | -0.63*  | 0.51          | -0.38     | -0.78** |
| $dN/dS$       |      |         | 0.16     | 0.10    | 0.50*     | -0.49   | 0.42          | 0.43      | -0.57*  |
| Maturity      |      |         |          | 0.61**  | 0.53**    | 0.04    | 0.10          | 0.65**    | -0.01   |
| Mass          |      |         |          |         | 0.52**    | 0.35    | -0.18         | 0.64**    | 0.30    |
| Longevity     |      |         |          |         |           | -0.23   | 0.25          | 0.87**    | -0.30   |
| $\pi_S$       |      |         |          |         |           |         | -0.79**       | -0.02     | 0.91**  |
| $\pi_N/\pi_S$ |      |         |          |         |           |         |               | 0.09      | -0.74** |
| Gen. time     |      |         |          |         |           |         |               |           | -0.13   |

Asterisks indicate strength of support (\*\*:  $pp > 0.975$ , \*:  $pp > 0.95$ )

Table S2. Estimates of mutation rate per year  $r$  and per generation  $u$  (posterior median and 96% credible interval), for extant and ancestral species, under a uniform prior over divergence times.

| species               | $r$ (per $10^9$ years)         |                             | $u$ (per $10^8$ generation)    |                             | pedigrees <sup>c</sup> |
|-----------------------|--------------------------------|-----------------------------|--------------------------------|-----------------------------|------------------------|
|                       | without anc. pol. <sup>a</sup> | with anc. pol. <sup>b</sup> | without anc. pol. <sup>a</sup> | with anc. pol. <sup>b</sup> |                        |
| <i>Homo</i>           | 0.79 ( 0.59, 1.11)             | 0.65 ( 0.48, 0.90)          | 2.29 ( 1.70, 3.21)             | 1.90 ( 1.38, 2.61)          | 1.23 - 1.29            |
| <i>Pan</i>            | 0.75 ( 0.61, 0.90)             | 0.63 ( 0.50, 0.76)          | 1.79 ( 1.48, 2.15)             | 1.51 ( 1.21, 1.83)          | 1.26 - 1.48            |
| <i>Gorilla</i>        | 0.76 ( 0.43, 1.19)             | 0.54 ( 0.29, 0.90)          | 1.44 ( 0.82, 2.27)             | 1.03 ( 0.56, 1.70)          | 1.13                   |
| <i>Pongo</i>          | 0.86 ( 0.54, 1.23)             | 0.73 ( 0.45, 1.06)          | 2.14 ( 1.36, 3.08)             | 1.83 ( 1.12, 2.65)          | 1.66                   |
| <i>Homo - Pan</i>     | 0.70 ( 0.50, 0.98)             | 0.60 ( 0.41, 0.85)          | 1.68 ( 1.25, 2.22)             | 1.43 ( 1.03, 1.91)          |                        |
| <i>Homo - Gorilla</i> | 0.73 ( 0.51, 1.03)             | 0.66 ( 0.46, 0.95)          | 1.65 ( 1.23, 2.17)             | 1.46 ( 1.07, 1.96)          |                        |
| <i>Homo - Pongo</i>   | 0.78 ( 0.49, 1.20)             | 0.71 ( 0.43, 1.12)          | 1.61 ( 1.11, 2.25)             | 1.44 ( 0.94, 2.07)          |                        |
| Hominoidea            | 0.71 ( 0.42, 1.15)             | 0.67 ( 0.39, 1.08)          | 1.31 ( 0.85, 1.94)             | 1.20 ( 0.77, 1.75)          |                        |
| <i>Macaca</i>         | 0.62 ( 0.48, 0.77)             | 0.53 ( 0.40, 0.68)          | 0.87 ( 0.68, 1.08)             | 0.74 ( 0.56, 0.95)          | 0.37                   |
| <i>Papio</i>          | 0.91 ( 0.50, 1.69)             | 0.70 ( 0.37, 1.30)          | 1.24 ( 0.73, 1.98)             | 0.97 ( 0.54, 1.58)          | 0.55                   |
| Cercopithecidae       | 1.06 ( 0.71, 1.59)             | 1.00 ( 0.66, 1.56)          | 1.22 ( 0.90, 1.67)             | 1.13 ( 0.80, 1.61)          |                        |
| Catarrhini            | 0.87 ( 0.52, 1.42)             | 0.91 ( 0.54, 1.60)          | 1.18 ( 0.78, 1.73)             | 1.20 ( 0.76, 1.86)          |                        |
| <i>Aotus</i>          | 0.96 ( 0.52, 1.67)             | 0.91 ( 0.46, 1.61)          | 1.03 ( 0.58, 1.65)             | 0.96 ( 0.50, 1.56)          | 0.81                   |
| Platyrrhini           | 1.49 ( 1.01, 2.21)             | 1.43 ( 0.93, 2.18)          | 1.56 ( 1.14, 2.15)             | 1.50 ( 1.06, 2.12)          |                        |
| Simiiformes           | 1.53 ( 0.87, 2.76)             | 1.66 ( 0.88, 3.10)          | 1.56 ( 1.03, 2.46)             | 1.70 ( 1.08, 2.72)          |                        |
| Haplorrhini           | 2.77 ( 1.33, 5.76)             | 2.97 ( 1.44, 6.46)          | 1.78 ( 1.03, 3.09)             | 2.05 ( 1.16, 3.68)          |                        |
| Lorisiformes          | 2.18 ( 1.25, 3.85)             | 2.28 ( 1.26, 4.22)          | 1.21 ( 0.80, 1.86)             | 1.29 ( 0.80, 2.11)          |                        |
| Lemuriformes          | 1.22 ( 0.70, 2.12)             | 1.31 ( 0.72, 2.39)          | 1.11 ( 0.72, 1.73)             | 1.16 ( 0.73, 1.86)          |                        |
| Strepsirrhini         | 3.42 ( 1.64, 7.04)             | 3.80 ( 1.81, 8.45)          | 1.98 ( 1.16, 3.48)             | 2.33 ( 1.32, 4.34)          |                        |
| Primates              | 3.04 ( 1.47, 6.39)             | 3.22 ( 1.54, 7.08)          | 1.86 ( 1.09, 3.29)             | 2.10 ( 1.18, 3.86)          |                        |

<sup>a</sup> naive-phylogenetic method (not accounting for ancestral polymorphism); <sup>b</sup> mean-coalescent method (accounting for ancestral polymorphism); <sup>c</sup> from Table 1 of Wu et al (2019)

Table S3. Estimates of effective population size ( $\times 10^{-3}$ , posterior median and 95% credible interval) for extant taxa and ancestors, under a uniform prior over divergence times.

| species             | mechanistic        | mech. w/o anc. pol. | phenomenological  | uncoupled       | coal. <sup>a</sup> | hmmcoal <sup>b</sup> |
|---------------------|--------------------|---------------------|-------------------|-----------------|--------------------|----------------------|
| <i>Homo</i>         | 23 ( 17, 32)       | 19 ( 14, 26)        | 19 ( 12, 35)      | 21 ( 13, 35)    | (13, 16)           | 8                    |
| <i>Pan</i>          | 69 ( 57, 86)       | 58 ( 48, 70)        | 72 ( 45, 114)     | 61 ( 39, 103)   | (31, 62)           | 30                   |
| <i>Gorilla</i>      | 69 ( 24, 184)      | 67 ( 26, 177)       | 102 ( 34, 334)    | 48 ( 20, 117)   | (28, 57)           | 21                   |
| <i>Pongo</i>        | 42 ( 14, 113)      | 37 ( 13, 93)        | 50 ( 19, 125)     | 32 ( 10, 106)   | (42, 85)           | 19                   |
| <i>Homo-Pan</i>     | 46 ( 28, 74)       | 45 ( 28, 72)        | 49 ( 29, 88)      | 40 ( 24, 65)    | (10, 47)           | 50                   |
| <i>Homo-Gorilla</i> | 47 ( 26, 78)       | 47 ( 28, 80)        | 53 ( 29, 98)      | 41 ( 24, 71)    | (27, 61)           | 47                   |
| Hominidae           | 53 ( 26, 106)      | 45 ( 23, 86)        | 53 ( 27, 111)     | 48 ( 22, 105)   |                    |                      |
| Hominoidea          | 62 ( 30, 131)      | 57 ( 29, 112)       | 70 ( 34, 159)     | 58 ( 25, 137)   |                    |                      |
| Cercopithecidae     | 67 ( 35, 125)      | 74 ( 42, 128)       | 79 ( 41, 156)     | 73 ( 37, 152)   |                    |                      |
| Catarrhini          | 74 ( 35, 156)      | 73 ( 38, 145)       | 69 ( 33, 155)     | 58 ( 26, 131)   |                    |                      |
| Platyrrhini         | 42 ( 21, 83)       | 37 ( 20, 71)        | 32 ( 16, 61)      | 31 ( 13, 75)    |                    |                      |
| Simiiformes         | 60 ( 26, 138)      | 56 ( 27, 124)       | 37 ( 15, 87)      | 36 ( 14, 90)    |                    |                      |
| <i>Tarsius</i>      | 536 ( 99, 4855)    | 407 ( 88, 2558)     | 107 ( 22, 561)    | 56 ( 5, 599)    |                    |                      |
| Haplorrhini         | 92 ( 37, 239)      | 83 ( 36, 207)       | 32 ( 9, 97)       | 34 ( 11, 103)   |                    |                      |
| Lorisiformes        | 125 ( 58, 279)     | 124 ( 61, 286)      | 46 ( 14, 120)     | 49 ( 20, 121)   |                    |                      |
| Lemuriformes        | 94 ( 41, 202)      | 90 ( 41, 187)       | 89 ( 34, 218)     | 123 ( 51, 310)  |                    |                      |
| <i>Daubentonia</i>  | 1251 ( 208, 11831) | 1296 ( 237, 8859)   | 1030 ( 181, 8983) | 443 ( 56, 3733) |                    |                      |
| Strepsirrhini       | 91 ( 35, 246)      | 82 ( 34, 214)       | 27 ( 7, 91)       | 33 ( 12, 92)    |                    |                      |
| Primates            | 93 ( 35, 240)      | 80 ( 34, 201)       | 29 ( 7, 94)       | 32 ( 11, 97)    |                    |                      |

<sup>a</sup> from Prado-Martinez et al, 2013, table 1, for extant hominids, and from Rannala and Yang, 2003 for ancestral species; <sup>b</sup> from Prado-Martinez et al, 2013, figure 2

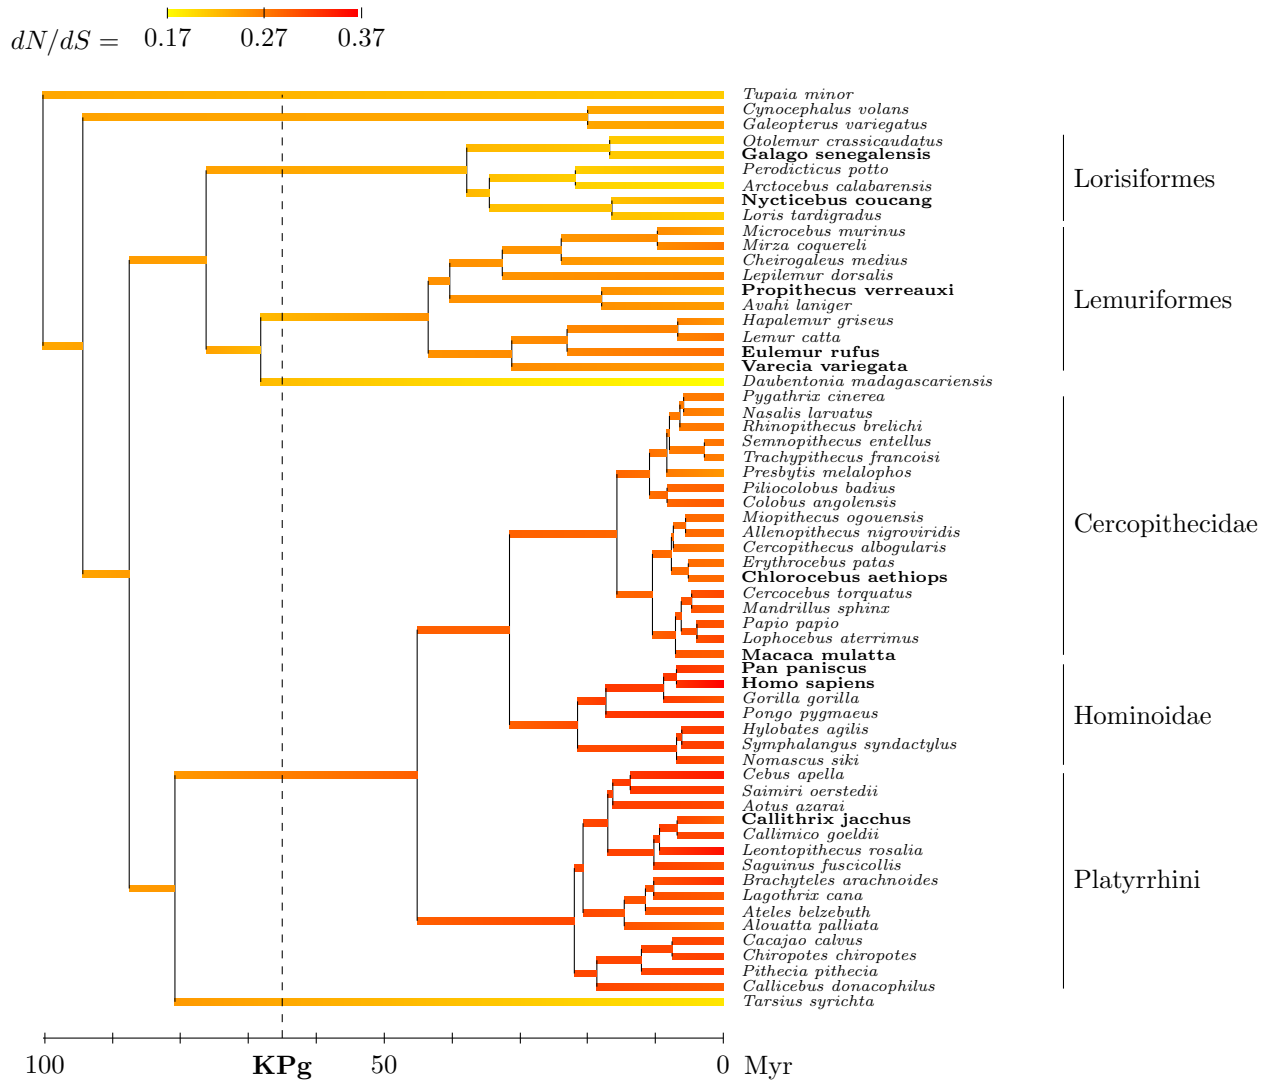

Figure S1. Reconstructed phylogenetic history of  $dN/dS$  (posterior median estimate) under the phenomenological model.

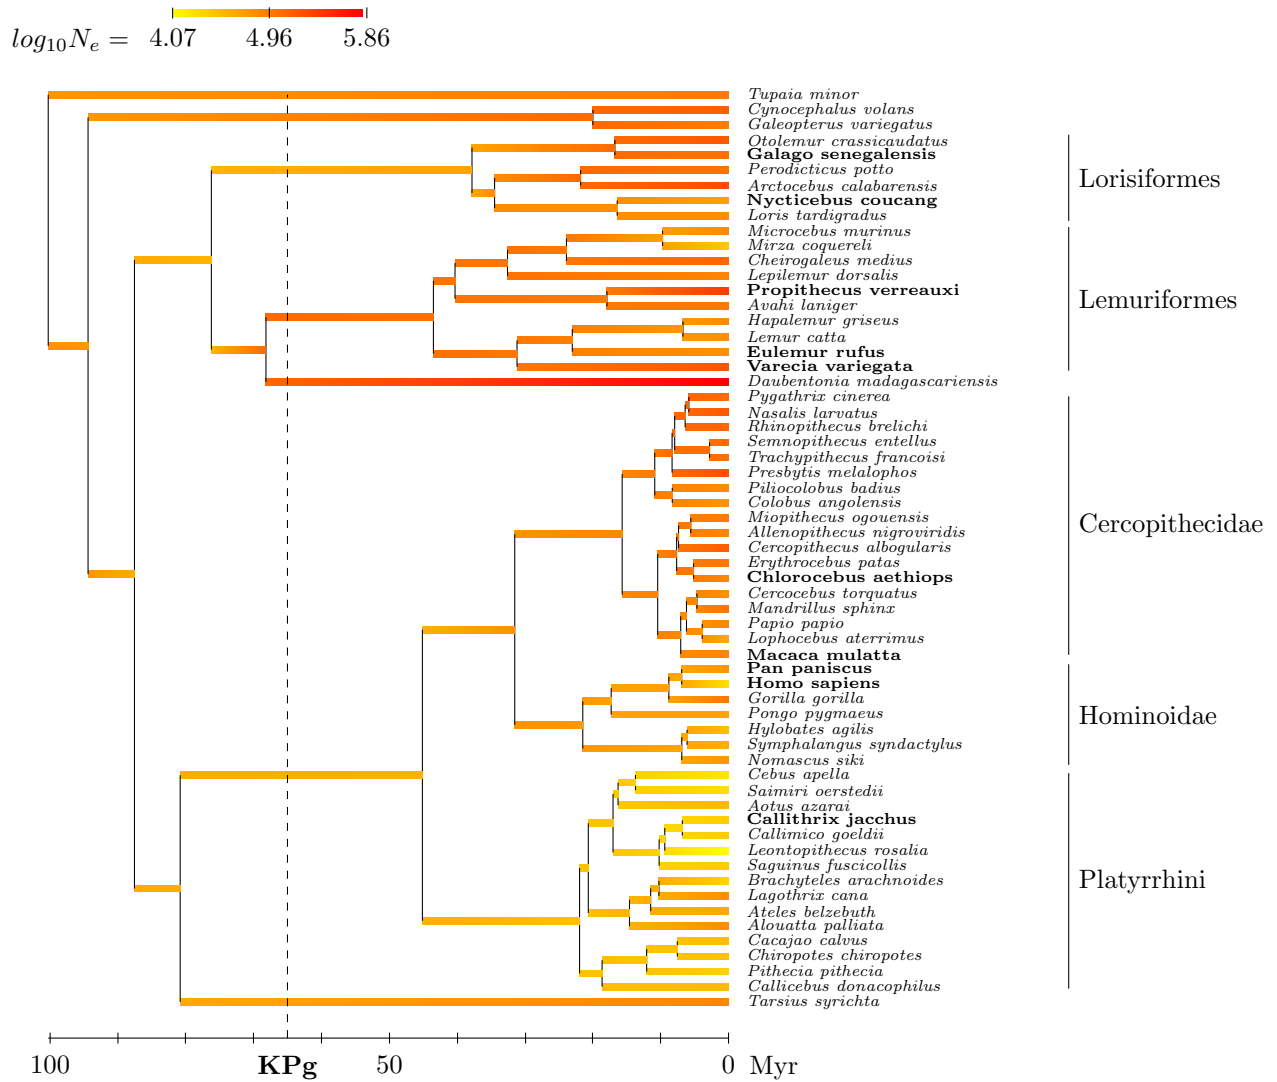

Figure S2. Reconstructed phylogenetic history of  $N_e$  (posterior median estimate) under the phenomenological model.

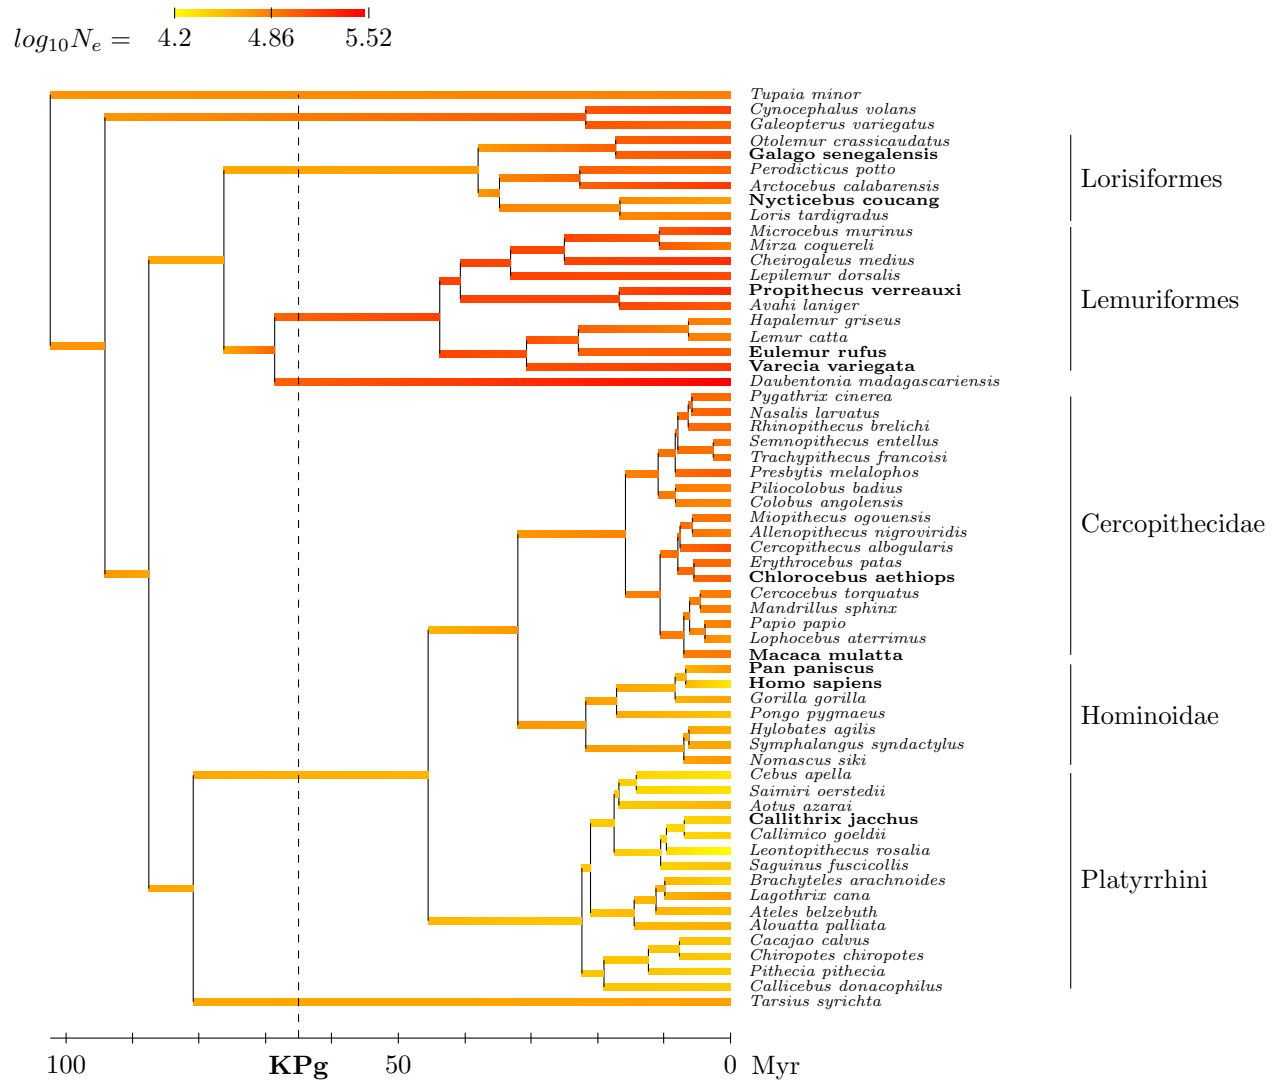

Figure S3. Reconstructed phylogenetic history of  $N_e$  (posterior median estimate) under the uncoupled model.

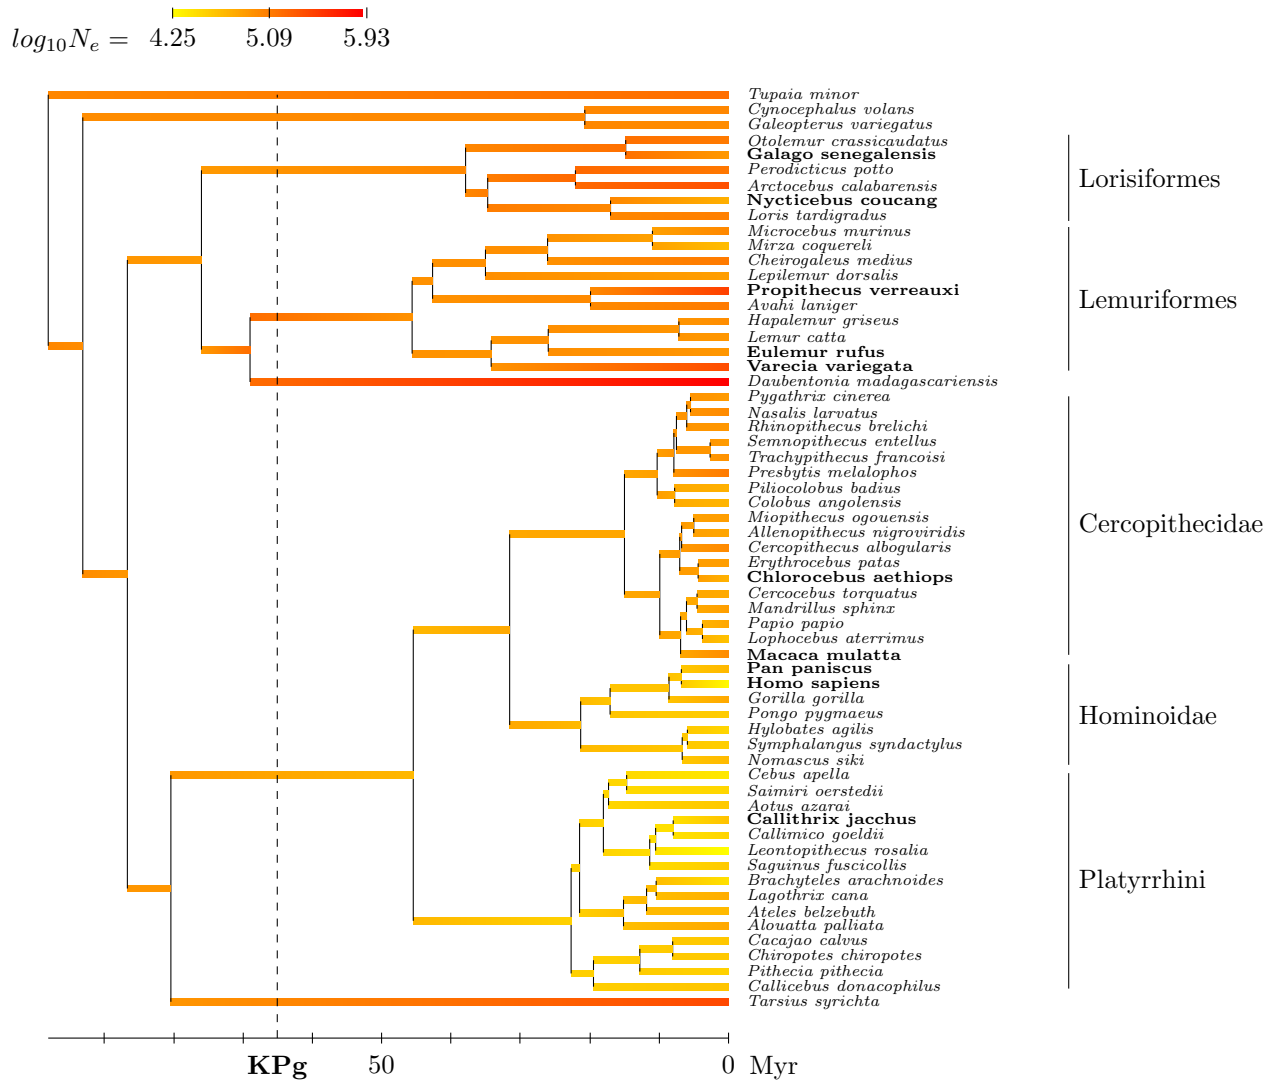

Figure S4. Reconstructed phylogenetic history of  $N_e$  (posterior median estimate) under the mechanistic model, without ancestral polymorphism.



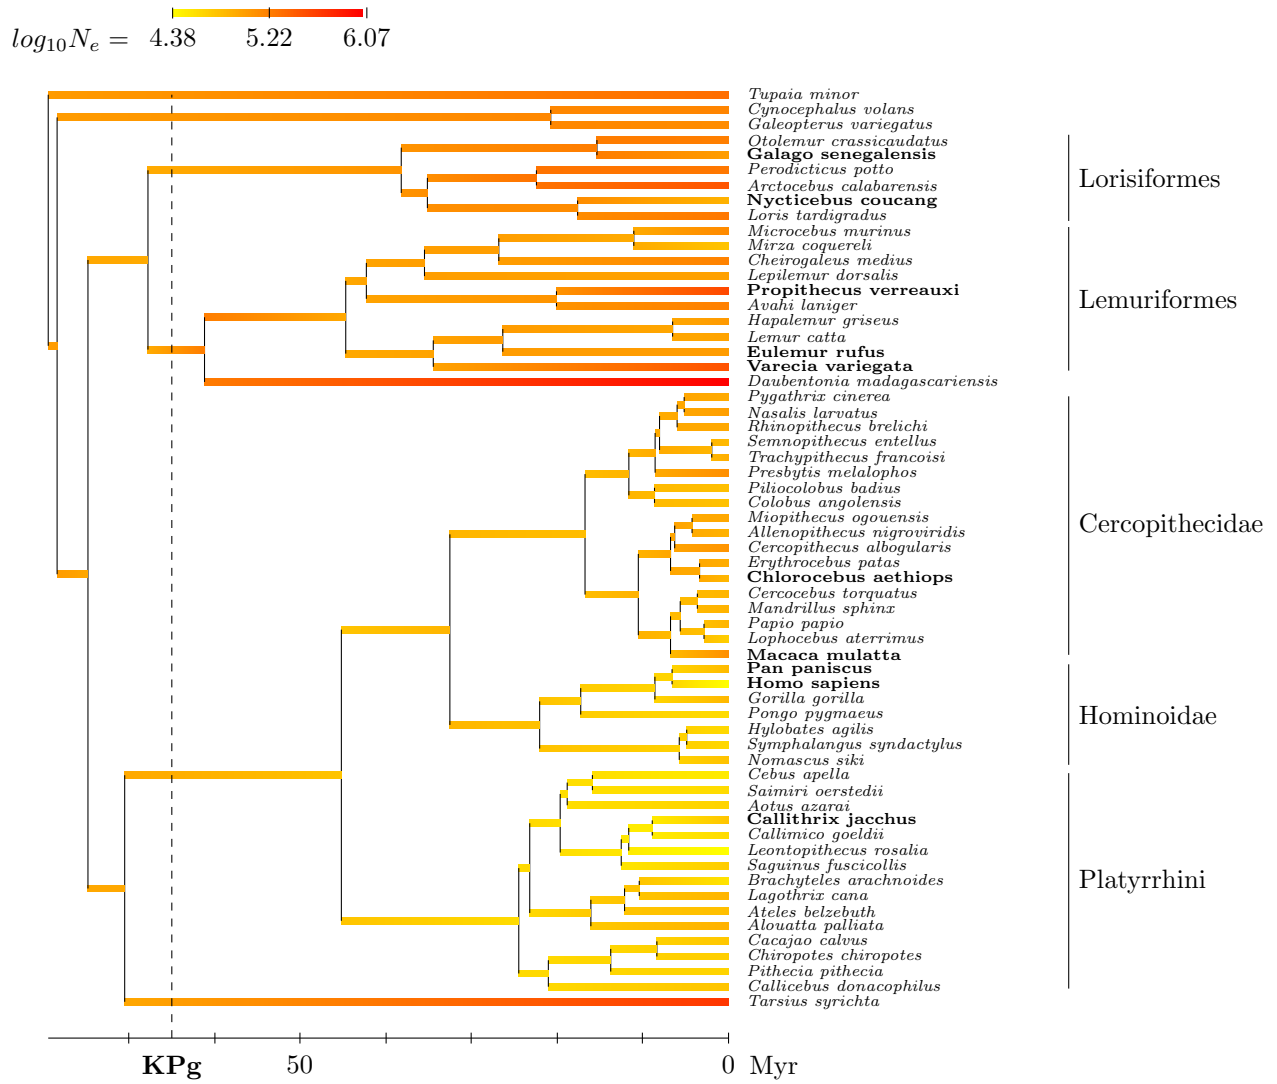

Figure S5. Reconstructed phylogenetic history of  $N_e$  (posterior median estimate) under the mechanistic model and using a uniform prior over divergence times.

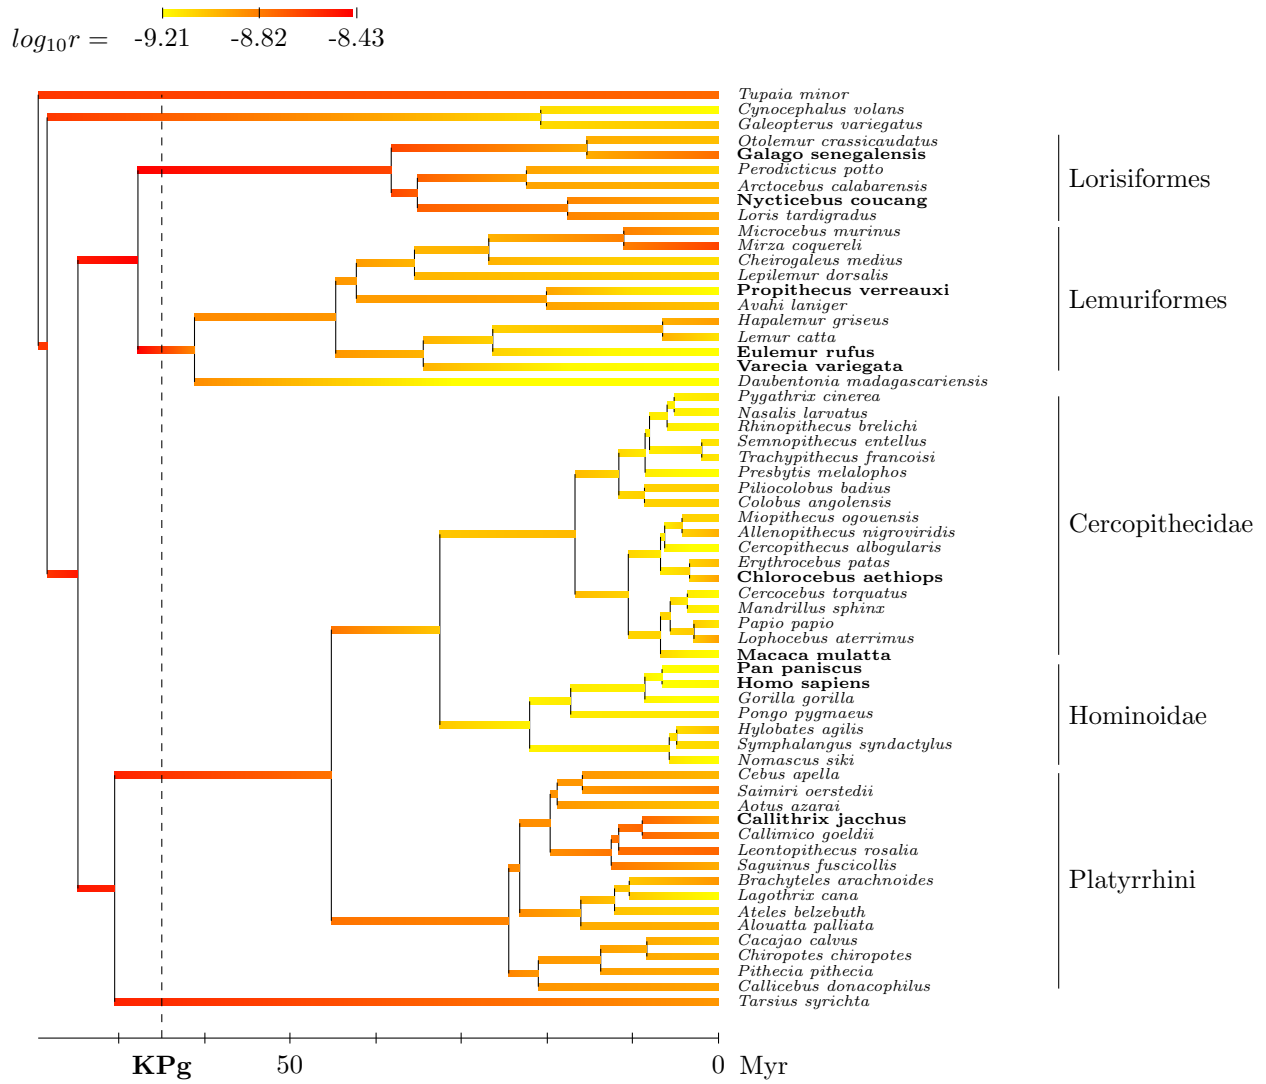

Figure S6. Reconstructed phylogenetic history of  $r$  (posterior median estimate) under the mechanistic model and using a uniform prior over divergence times.

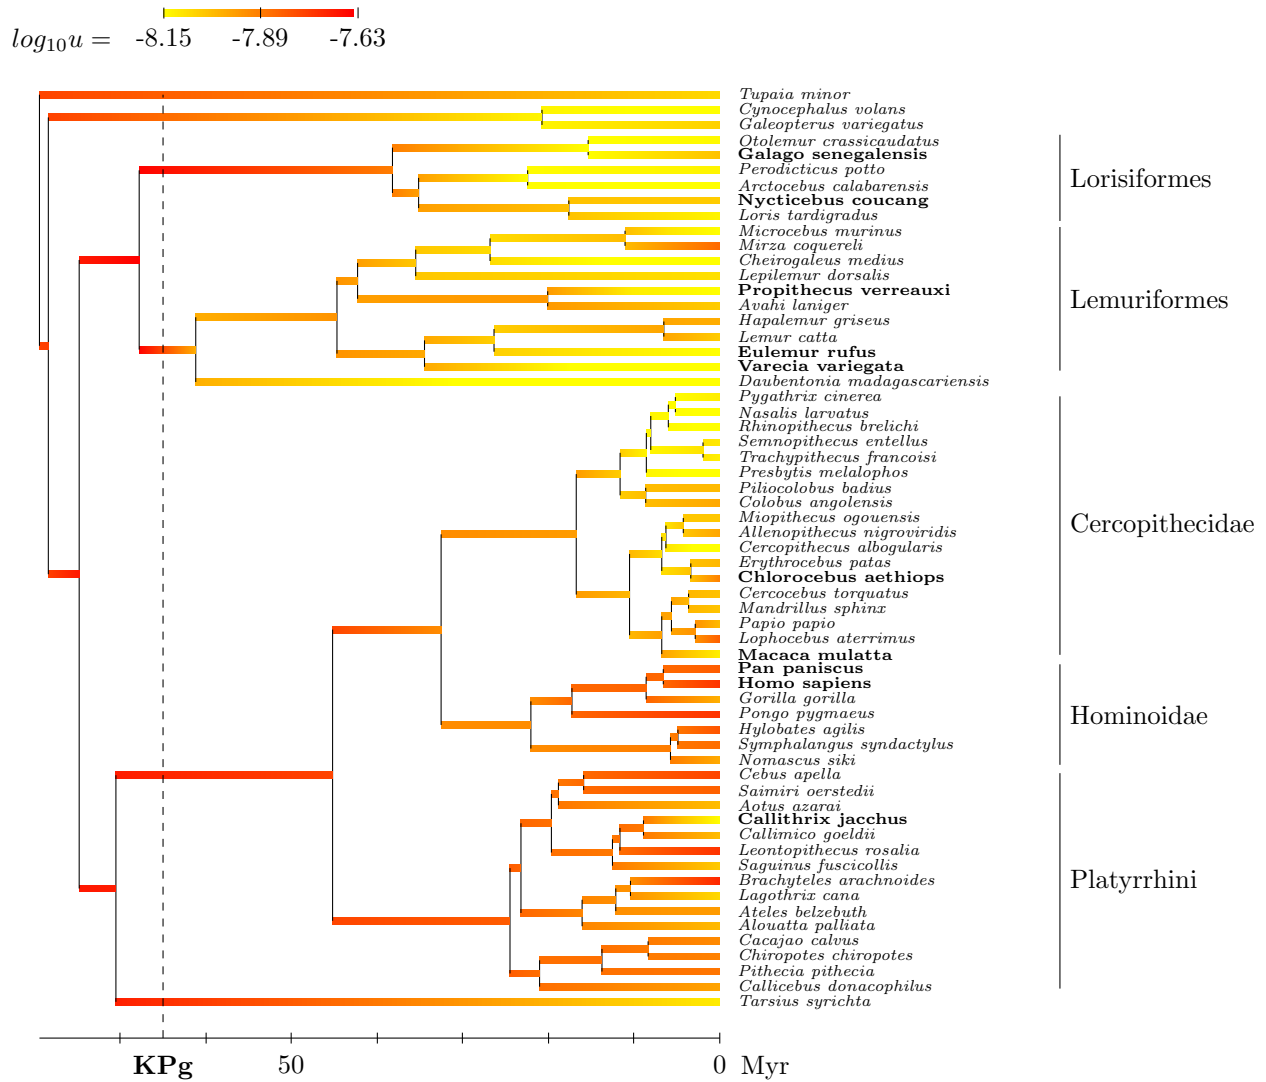

Figure S7. Reconstructed phylogenetic history of  $u$  (posterior median estimate) under the mechanistic model and using a uniform prior over divergence times.
